# Supplementary material for: Crosslinked reduced graphene oxide/polymer composites via in situ synthesis by semicontinuous emulsion polymerization
Source: Royal Society of Chemistry journal article supplement (doi:10.1039/c4ra16406g), 2015-01-01
Supplement: c4ra16406g1.pdf [file c4ra16406g1.pdf]

## Supporting Information

### Crosslinked reduced graphene oxide/polymer composites via *in situ* synthesis by semicontinuous emulsion polymerization

*Despina Spasevska<sup>a</sup>, Gracia Patricia Leal<sup>b</sup>, Mercedes Fernandez<sup>b</sup>, Jadranka Blazevska Gilev<sup>a</sup>, Maria Paulis<sup>b</sup>, Radmila Tomovska<sup>b,c</sup>*

<sup>a</sup>Faculty of Technology and Metallurgy, University of Cyril and Methodius, Rudjer Boskovic 16, 1000 Skopje, R. Macedonia

<sup>b</sup>POLYMAT, Facultad de Ciencias Químicas, University of the Basque Country UPV/EHU, Joxe Mari Korta zentroa, Tolosa Etorbidea 72, Donostia-San Sebastián 20018, Spain

<sup>c</sup>IKERBASQUE, Basque Foundation for Science, 48011 Bilbao, Spain

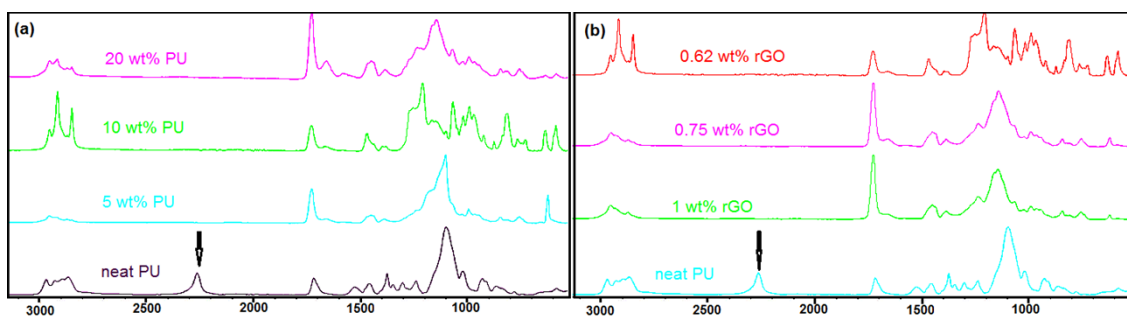

Figure 1s. Comparison of FTIR spectra of nanocomposites and the neat PU prepolymer: (a) at constant rGO content of 0.63 wt% and different PU loadings; and (b) at constant PU content of 10 wt% and different rGO loadings. The arrow points out the characteristic vibration of free NCO functionalities in PU. The absence of this peak in FTIR spectra of nanocomposites indicates full consumption of NCOs during composites synthesis.

The mean particle diameters of the hybrid latexes were measured by using dynamic light scattering (Zetasizer Nano Z, Malvern Instruments). The samples were prepared by diluting one drop of latex in deionized water. The particle diameters reported are the z-average of two measurements. The hybrid latexes have small sedimentation on the bottom of the vials after storage of almost one year. Table S1 presents three results for

each latex; the mean particle diameter just after reaction, the one from the dispersed phase after almost one year of storage and the one after redispersing the whole latex after the storage.

Table S1. Mean particle diameter of the latexes, just after reaction and after one year of storage.

| <b>PU content<br/>(%wt.)</b> | <b>rGO<br/>content<br/>(%wt.)</b> | <b>Particle size<br/>/Polydispersity<br/>index<br/>As obtained<br/>latex (nm)</b> | <b>Particle size<br/>/Polydispersity<br/>index<br/>Dispersed part<br/>after storage<br/>(nm)</b> | <b>Particle size<br/>/Polydispersity<br/>index<br/>Whole latex,<br/>after storage<br/>(nm)</b> |
|------------------------------|-----------------------------------|-----------------------------------------------------------------------------------|--------------------------------------------------------------------------------------------------|------------------------------------------------------------------------------------------------|
| 0                            | 0.62                              | 104/0.216                                                                         | Visible phase separation                                                                         |                                                                                                |
| 5                            | 0.62                              | 445/0.569                                                                         | 85/0.240                                                                                         | 842/0.873                                                                                      |
| 10                           | 0.62                              | 930/0.795                                                                         |                                                                                                  |                                                                                                |
| 20                           | 0.62                              | 220/0.854                                                                         |                                                                                                  |                                                                                                |
| 10                           | 0.75                              | 176/0.730                                                                         | 123/0.363                                                                                        | 231/0.372                                                                                      |
| 10                           | 1                                 | 90/0.331                                                                          | 81/0.373                                                                                         | 93/0.351                                                                                       |
